# Supplementary material for: Use of Artificial Intelligence Methods for Predicting the Strength of Recycled Aggregate Concrete and the Influence of Raw Ingredients
Source: MDPI journal article supplement (doi:10.3390/ma15124194), 2022-06-13
Supplement: s1 [file s1]

## **Additional Information**

### **1. AdaBoost**

```
from sklearn.ensemble import AdaBoostRegressor

# Importing the datasamples

WM=pd.read_csv('STS.csv')

WM.head()

X=WM.iloc[:, :-1].values

y=WM.iloc[:, -1].values

# Splitting into train set and test set

from sklearn.model_selection import train_test_split

X_train, X_test, y_train, y_test = train_test_split(X, y, test_size = 0.3, random_state = 0 )
```

### **2. Random Forest**

```
from sklearn.ensemble import BaggingRegressor, RandomForestRegressor

# Importing the datasamples

WM=pd.read_csv('STS.csv')

WM.head()

X=WM.iloc[:, :-1].values

y=WM.iloc[:, -1].values

from sklearn.model_selection import train_test_split

X_train, X_test, y_train, y_test = train_test_split(X, y, test_size = 0.30, random_state = 0 )
```

### 3. SVM

```
from sklearn.svm import SVM

# Importing the datasamples

WM=pd.read_csv('STS.csv')

WM.head()

X=WM.iloc[:, :-1].values

y=WM.iloc[:, -1].values

# Splitting into train set and test set

from sklearn.model_selection import train_test_split

X_train, X_test, y_train, y_test = train_test_split(X, y, test_size = 0.30, random_state = 0 )
```

### 4. Bagging

```
from sklearn.ensemble import BaggingRegressor

# Importing the datasamples

WM=pd.read_csv('STS.csv')

WM.head()

X=WM.iloc[:, :-1].values

y=WM.iloc[:, -1].values

# Splitting into train set and test set

from sklearn.model_selection import train_test_split

X_train, X_test, y_train, y_test = train_test_split(X, y, test_size = 0.30, random_state = 0 )
```

## 5. Dataset

Table S1. Database for recycled aggregate concrete.

| Ref. | Water<br>(kg/m <sup>3</sup> ) | Cement<br>(kg/m <sup>3</sup> ) | Sand<br>(kg/m <sup>3</sup> ) | NCA<br>(kg/m <sup>3</sup> ) | RCA<br>(kg/m <sup>3</sup> ) | SP<br>(kg/m <sup>3</sup> ) | $D_{max\_RCA}$<br>(mm) | $\rho_{RCA}$<br>(kg/m <sup>3</sup> ) | $W_{RCA}$<br>(%) | STS<br>(MPa) |
|------|-------------------------------|--------------------------------|------------------------------|-----------------------------|-----------------------------|----------------------------|------------------------|--------------------------------------|------------------|--------------|
| [1]  | 207.6                         | 400                            | 662                          | 863                         | 153                         | 0                          | 20                     | 2410                                 | 5.8              | 3.7          |
|      | 207.6                         | 400                            | 662                          | 697                         | 298                         | 0                          | 20                     | 2410                                 | 5.8              | 3.6          |
|      | 207.6                         | 400                            | 662                          | 383                         | 573                         | 0                          | 20                     | 2410                                 | 5.8              | 3.4          |
|      | 207.6                         | 400                            | 662                          | 0                           | 903                         | 0                          | 20                     | 2410                                 | 5.8              | 3.3          |
| [2]  | 165                           | 300                            | 765                          | 905                         | 267                         | 4.98                       | 25                     | 2430                                 | 4.4              | 3            |
|      | 165                           | 318                            | 739                          | 608                         | 537                         | 6.042                      | 25                     | 2430                                 | 4.4              | 3.2          |
|      | 162                           | 325                            | 683                          | 0                           | 1123                        | 6.175                      | 25                     | 2430                                 | 4.4              | 3.2          |
| [3]  | 160.6                         | 380                            | 598                          | 1182                        | 52                          | 4.9                        | 20                     | 2165                                 | 6.8              |              |
|      | 165.4                         | 380                            | 529                          | 1175                        | 103                         | 4.9                        | 20                     | 2165                                 | 6.8              |              |
|      | 170.2                         | 380                            | 460                          | 1168                        | 154                         | 4.9                        | 20                     | 2165                                 | 6.8              | 3.7          |
|      | 175.6                         | 380                            | 327                          | 1162                        | 254                         | 4.9                        | 20                     | 2165                                 | 6.8              |              |
|      | 180.9                         | 380                            | 0                            | 1162                        | 509                         | 4.9                        | 20                     | 2165                                 | 6.8              | 3            |
| [4]  | 180                           | 400                            | 708                          | 886                         | 215                         | 0                          | 20                     | 2570                                 | 3.5              | 3.2          |
|      | 180                           | 400                            | 708                          | 554                         | 538                         | 0                          | 20                     | 2570                                 | 3.5              | 3            |
|      | 180                           | 400                            | 708                          | 0                           | 1075                        | 0                          | 20                     | 2570                                 | 3.5              | 2.8          |
|      | 225                           | 410                            | 642                          | 840                         | 204                         | 0                          | 20                     | 2570                                 | 3.5              | 3.2          |
|      | 225                           | 410                            | 642                          | 524                         | 506                         | 0                          | 20                     | 2570                                 | 3.5              | 3.2          |
|      | 225                           | 410                            | 642                          | 0                           | 1017                        | 0                          | 20                     | 2570                                 | 3.5              | 3.1          |
| [5]  | 225                           | 410                            | 642                          | 840                         | 204                         | 0                          | 20                     | 2580                                 | 3.5              | 3.6          |
|      | 225                           | 410                            | 642                          | 524                         | 506                         | 0                          | 20                     | 2580                                 | 3.5              | 3.4          |
|      | 225                           | 410                            | 642                          | 0                           | 1017                        | 0                          | 20                     | 2580                                 | 3.5              | 3.3          |

|     |     |     |        |        |         |      |    |      |     |      |
|-----|-----|-----|--------|--------|---------|------|----|------|-----|------|
|     | 205 | 410 | 662    | 865    | 210     | 0    | 20 | 2580 | 3.5 | 3.6  |
|     | 205 | 410 | 662    | 541    | 525     | 0    | 20 | 2580 | 3.5 | 3.6  |
|     | 205 | 410 | 662    | 0      | 1049    | 0    | 20 | 2580 | 3.5 | 3.4  |
|     | 180 | 400 | 708    | 886    | 215     | 5.6  | 20 | 2580 | 3.5 | 3.7  |
|     | 180 | 400 | 708    | 554    | 538     | 5.6  | 20 | 2580 | 3.5 | 3.7  |
|     | 180 | 400 | 708    | 0      | 1075    | 5.6  | 20 | 2580 | 3.5 | 3.5  |
|     | 160 | 400 | 729    | 912    | 221     | 7.8  | 20 | 2580 | 3.5 | 4.1  |
|     | 160 | 400 | 729    | 570    | 554     | 7.8  | 20 | 2580 | 3.5 | 4    |
|     | 160 | 400 | 729    | 0      | 1107    | 7.8  | 20 | 2580 | 3.5 | 3.8  |
| [6] | 175 | 350 | 730    | 711    | 297     | 1.68 | 25 | 2530 | 1.9 | 4.2  |
|     | 175 | 350 | 730    | 508    | 494     | 1.68 | 25 | 2530 | 1.9 | 4    |
|     | 175 | 350 | 730    | 0      | 989     | 1.68 | 25 | 2530 | 1.9 | 3.8  |
|     | 175 | 350 | 730    | 711    | 282     | 1.68 | 25 |      |     | 3.6  |
|     | 175 | 350 | 730    | 508    | 469     | 1.68 | 25 | 2400 | 6.2 | 3.4  |
|     | 175 | 350 | 730    | 0      | 938     | 1.68 | 25 | 2400 | 6.2 | 3.2  |
| [7] | 186 | 372 | 617.65 | 772.67 | 515.55  | 0    | 20 | 2400 |     | 2.8  |
|     | 186 | 372 | 617.65 | 515.11 | 772.67  | 0    | 20 | 2400 |     | 2.7  |
|     | 186 | 372 | 617.65 | 257.56 | 1030.22 | 0    | 20 | 2400 |     | 2.2/ |
|     | 186 | 372 | 494.12 | 128.78 | 123.53  | 0    | 20 | 2630 |     | 2.6  |
|     | 186 | 372 | 370.59 | 128.78 | 247.06  | 0    | 20 | 2630 |     | 2.5  |
|     | 186 | 372 | 247.06 | 128.78 | 370.59  | 0    | 20 | 2630 |     | 2.3  |
|     | 186 | 372 | 123.53 | 128.78 | 494.12  | 0    | 20 | 2630 |     | 2.0  |
| [8] | 200 | 270 | 750    | 675    | 200     | 1.08 | 19 | 2440 | 5.8 | 1.9  |
|     | 210 | 270 | 750    | 450    | 400     | 1.35 | 19 | 2440 | 5.8 | 1.9  |
|     | 220 | 270 | 750    | 225    | 600     | 1.62 | 19 | 2440 | 5.8 | 1.4  |

|                      |        |     |         |        |        |         |    |      |      |     |
|----------------------|--------|-----|---------|--------|--------|---------|----|------|------|-----|
|                      | 165    | 370 | 865     | 760    | 230    | 1.48    | 19 | 2440 | 5.8  | 3.1 |
|                      | 165    | 370 | 865     | 505    | 455    | 1.85    | 19 | 2440 | 5.8  | 3.1 |
|                      | 165    | 370 | 865     | 250    | 680    | 2.59    | 19 | 2440 | 5.8  | 2.9 |
| <a href="#">[9]</a>  | 178.5  | 275 | 938.05  | 723.07 | 180.77 | 1.925   | 16 | 2400 | 5    | 2.4 |
|                      | 178.5  | 275 | 962.73  | 423.77 | 423.77 | 1.925   | 16 | 2400 | 5    | 2.5 |
|                      | 178.5  | 275 | 1005.18 | 0      | 756.46 | 1.925   | 16 | 2400 | 5    | 2.6 |
|                      | 190    | 380 | 794.31  | 750.04 | 187.57 | 2.66    | 16 | 2400 | 5    | 3.1 |
|                      | 190    | 380 | 811.37  | 443.71 | 443.71 | 2.66    | 16 | 2400 | 5    | 2.9 |
|                      | 190    | 380 | 838.29  | 0      | 807.97 | 2.66    | 16 | 2400 | 5    | 2.9 |
| <a href="#">[10]</a> | 172.43 | 401 | 574     | 911    | 303    | 0.2005  | 20 | 2661 | 1.9  | 2.3 |
|                      | 172.43 | 401 | 574     | 585    | 585    | 0.70175 | 20 | 2602 | 2.6  | 2.1 |
|                      | 172.43 | 401 | 574     | 0      | 1119   | 0.90225 | 20 | 2510 | 3.9  | 2   |
| <a href="#">[11]</a> | 150    | 250 | 762     | 858    | 286    | 4.375   | 19 |      |      | 2.2 |
|                      | 150    | 250 | 753     | 564    | 564    | 4.375   | 19 |      |      | 1.8 |
|                      | 150    | 250 | 743     | 279    | 836    | 4.375   | 19 |      |      | 1.4 |
|                      | 150    | 250 | 734     | 0      | 1100   | 4.375   | 19 |      |      | 1.2 |
|                      | 180    | 400 | 685     | 770    | 257    | 3       | 19 |      |      | 3.1 |
|                      | 180    | 400 | 676     | 507    | 507    | 3       | 19 |      |      | 2.7 |
|                      | 180    | 400 | 667     | 250    | 751    | 3       | 19 |      |      | 2.5 |
|                      | 180    | 400 | 659     | 0      | 988    | 3       | 19 |      |      | 2.1 |
| <a href="#">[12]</a> | 193    | 350 | 661     | 1061   | 57     | 0       | 12 | 2010 | 10.9 | 2.9 |
|                      | 194    | 350 | 515     | 1061   | 170    | 0       | 12 | 2010 | 10.9 | 2.7 |
|                      | 196    | 350 | 368     | 1061   | 283    | 0       | 12 | 2010 | 10.9 | 2.6 |
|                      | 199    | 158 | 0       | 1061   | 566    | 0       | 12 | 2010 | 10.9 | 2.5 |
|                      | 158    | 350 | 693     | 1111   | 59     | 3.5     | 12 | 2010 | 10.9 | 3.4 |

|      |     |     |      |      |     |      |    |      |      |     |
|------|-----|-----|------|------|-----|------|----|------|------|-----|
|      | 163 | 350 | 536  | 1105 | 177 | 3.5  | 12 | 2010 | 10.9 | 3.3 |
|      | 168 | 350 | 381  | 1100 | 294 | 3.5  | 12 | 2010 | 10.9 | 3.1 |
|      | 178 | 350 | 0    | 1089 | 582 | 3.5  | 12 | 2010 | 10.9 | 3   |
|      | 137 | 350 | 713  | 1143 | 61  | 3.5  | 12 | 2010 | 10.9 | 4.2 |
|      | 139 | 350 | 555  | 1143 | 183 | 3.5  | 12 | 2010 | 10.9 | 4.5 |
|      | 143 | 350 | 395  | 1138 | 304 | 3.5  | 12 | 2010 | 10.9 | 3.7 |
|      | 150 | 350 | 0    | 1132 | 605 | 3.5  | 12 | 2010 | 10.9 | 3.4 |
| [13] | 180 | 281 | 802  | 0    | 970 | 0    | 10 | 2360 | 4.7  | 3.5 |
|      | 170 | 293 | 648  | 0    | 919 | 0    | 10 | 2280 | 6.2  | 3.1 |
|      | 165 | 337 | 841  | 0    | 879 | 0    | 10 | 2220 | 7.8  | 3.3 |
|      | 190 | 463 | 621  | 0    | 970 | 0    | 10 | 2360 | 4.7  | 3.8 |
|      | 190 | 500 | 621  | 0    | 919 | 3.24 | 10 | 2280 | 6.2  | 3.7 |
|      | 180 | 600 | 567  | 0    | 879 | 5.04 | 10 | 2220 | 7.8  | 3.7 |
|      | 220 | 537 | 693  | 782  | 138 | 0    | 20 | 2330 | 4.4  |     |
| [14] | 179 | 275 | 878  | 735  | 184 | 0    | 20 | 2320 | 5.3  | 2.8 |
|      | 179 | 275 | 849  | 455  | 455 | 0    | 20 | 2320 | 5.3  | 3.1 |
|      | 179 | 275 | 868  | 0    | 830 | 0    | 20 | 2320 | 5.3  | 2.4 |
|      | 190 | 380 | 744  | 757  | 189 | 0    | 20 | 2320 | 5.3  | 3.5 |
|      | 190 | 380 | 710  | 471  | 471 | 0    | 20 | 2320 | 5.3  | 2.7 |
|      | 190 | 380 | 715  | 0    | 874 | 0    | 20 | 2320 | 5.3  | 3.7 |
|      | 179 | 275 | 961  | 740  | 185 | 0    | 20 | 2320 | 5.3  | 2.5 |
|      | 179 | 275 | 978  | 408  | 408 | 0    | 20 | 2320 | 5.3  | 2.5 |
|      | 179 | 275 | 1010 | 0    | 640 | 0    | 20 | 2320 | 5.3  | 2.3 |
|      | 190 | 380 | 813  | 767  | 192 | 0    | 20 | 2320 | 5.3  | 2.8 |
|      | 190 | 380 | 822  | 426  | 427 | 0    | 20 | 2320 | 5.3  | 2.6 |

|                      |       |     |     |       |        |   |    |      |     |     |
|----------------------|-------|-----|-----|-------|--------|---|----|------|-----|-----|
| <a href="#">[15]</a> | 190   | 380 | 836 | 0     | 683    | 0 | 20 | 2320 | 5.3 | 2.3 |
|                      | 179   | 325 | 799 | 839   | 210    | 0 | 20 | 2320 | 5.3 | 2.8 |
|                      | 179   | 325 | 831 | 490   | 490    | 0 | 20 | 2320 | 5.3 | 2.7 |
|                      | 179   | 325 | 825 | 0     | 923    | 0 | 20 | 2320 | 5.3 | 2.3 |
|                      | 173   | 385 | 698 | 892   | 223    | 0 | 20 | 2320 | 5.3 | 3.1 |
|                      | 173   | 385 | 742 | 515   | 515    | 0 | 20 | 2320 | 5.3 | 3.9 |
|                      | 173   | 385 | 746 | 0     | 963    | 0 | 20 | 2320 | 5.3 | 2.4 |
|                      | 159.8 | 340 | 556 | 1020  | 238    | 0 | 20 | 2336 | 3.6 |     |
|                      | 159.8 | 340 | 556 | 638   | 596    | 0 | 20 | 2315 | 3.6 |     |
|                      | 159.8 | 340 | 556 | 319   | 894    | 0 | 20 | 2295 | 3.6 |     |
| <a href="#">[16]</a> | 137.1 | 380 | 927 | 869.2 | 202    | 0 | 10 | 2470 | 3.7 | 5.7 |
|                      | 146.5 | 380 | 927 | 543.2 | 505.1  | 0 | 10 | 2470 | 3.7 | 5.  |
|                      | 162.3 | 380 | 927 | 0     | 1010.2 | 0 | 10 | 2470 | 3.7 | 5.1 |
|                      | 138.2 | 380 | 927 | 869.2 | 195    | 0 | 10 | 2390 | 4.9 | 6.3 |
|                      | 149.8 | 380 | 927 | 543.2 | 487.5  | 0 | 10 | 2390 | 4.9 | 5.1 |
|                      | 170.4 | 380 | 927 | 0     | 975.1  | 0 | 10 | 2390 | 4.9 | 5.9 |
|                      | 139.7 | 380 | 927 | 869.2 | 187.8  | 0 | 10 | 2300 | 5.9 | 5.3 |
|                      | 153.1 | 380 | 927 | 543.4 | 469.4  | 0 | 10 | 2300 | 5.9 | 6.2 |
|                      | 175   | 380 | 927 | 0     | 938.8  | 0 | 10 | 2300 | 5.9 | 4.2 |
| <a href="#">[17]</a> | 205   | 300 | 697 | 0     | 1075   | 0 | 20 | 2450 | 3.1 | 2.5 |
|                      | 205   | 300 | 697 | 0     | 1027   | 0 | 20 | 2370 | 7.1 | 2.4 |
|                      | 205   | 300 | 697 | 0     | 1027   | 0 | 20 | 2360 | 7.8 | 1.9 |
|                      | 180   | 350 | 706 | 0     | 1089   | 0 | 20 | 2450 | 3.1 | 3.4 |
|                      | 180   | 350 | 706 | 0     | 1041   | 0 | 20 | 2370 | 7.1 | 2.6 |
|                      | 180   | 350 | 706 | 0     | 1041   | 0 | 20 | 2360 | 7.8 | 2.6 |

|                      |       |     |       |       |       |     |    |      |     |     |
|----------------------|-------|-----|-------|-------|-------|-----|----|------|-----|-----|
|                      | 185   | 425 | 696   | 0     | 1028  | 0   | 20 | 2450 | 3.1 | 3.9 |
|                      | 185   | 425 | 696   | 0     | 982   | 0   | 20 | 2370 | 7.1 | 3.7 |
|                      | 185   | 425 | 696   | 0     | 982   | 0   | 20 | 2360 | 7.8 | 3.4 |
|                      | 165   | 485 | 685   | 0     | 1039  | 0   | 20 | 2450 | 3.1 | 4.7 |
|                      | 165   | 485 | 685   | 0     | 979   | 0   | 20 | 2370 | 7.1 | 4.1 |
|                      | 165   | 485 | 685   | 0     | 982   | 0   | 20 | 2360 | 7.8 | 4.2 |
| <a href="#">[18]</a> | 178.3 | 358 | 730.4 | 783.6 | 299.3 | 0.3 | 19 | 2570 | 2.7 | 3.9 |
|                      | 178.3 | 358 | 730.4 | 458.3 | 598.4 | 0.3 | 19 | 2570 | 2.7 | 3.9 |
|                      | 178.3 | 358 | 730.4 | 0     | 1020  | 0.3 | 19 | 2570 | 2.7 | 3.3 |
| <a href="#">[19]</a> | 214.2 | 210 | 929   | 0     | 966   | 0   | 22 | 2451 | 7.8 | 2   |
|                      | 196   | 280 | 866   | 0     | 940   | 0   | 22 | 2387 | 6.9 | 2.9 |
|                      | 161   | 350 | 858   | 0     | 974   | 3.5 | 22 | 2362 | 4.2 | 4.6 |
|                      | 212.1 | 210 | 932   | 0     | 970   | 0   | 22 | 2456 | 7.5 | 2   |
|                      | 193.2 | 280 | 870   | 0     | 970   | 0   | 22 | 2455 | 6.4 | 2.9 |
|                      | 157.5 | 350 | 858   | 0     | 1029  | 3.5 | 22 | 2496 | 4.2 | 4.8 |
|                      | 207.9 | 210 | 938   | 0     | 953   | 0   | 22 | 2401 | 7.6 | 2.1 |
|                      | 187.6 | 280 | 877   | 0     | 988   | 0   | 22 | 2484 | 5.4 | 3   |
|                      | 150.5 | 350 | 868   | 0     | 982   | 3.5 | 22 | 2363 | 3.6 | 4.9 |
|                      | 205.8 | 210 | 943   | 0     | 977   | 0   | 22 | 2447 | 6.9 | 2.2 |
|                      | 190.4 | 280 | 873   | 0     | 962   | 0   | 22 | 2458 | 5.8 | 3   |
|                      | 157.5 | 350 | 858   | 0     | 1016  | 3.5 | 22 | 2464 | 3.9 | 5.0 |
| <a href="#">[20]</a> | 179   | 275 | 878   | 735   | 184   | 0   | 19 | 2320 | 5.3 | 4.1 |
|                      | 179   | 275 | 849   | 455   | 455   | 0   | 19 | 2320 | 5.3 | 4.7 |
|                      | 179   | 275 | 868   | 0     | 830   | 0   | 19 | 2320 | 5.3 | 4.9 |
|                      | 190   | 380 | 714   | 757   | 189   | 0   | 19 | 2320 | 5.3 | 4.7 |



|     |     |      |     |     |   |    |      |     |     |
|-----|-----|------|-----|-----|---|----|------|-----|-----|
| 190 | 380 | 710  | 471 | 471 | 0 | 19 | 2320 | 5.3 | 4.8 |
| 190 | 380 | 715  | 0   | 874 | 0 | 19 | 2320 | 5.3 | 5.0 |
| 179 | 275 | 961  | 740 | 185 | 0 | 19 | 2320 | 5.3 | 2.5 |
| 179 | 275 | 978  | 408 | 408 | 0 | 19 | 2320 | 5.3 | 2.4 |
| 179 | 275 | 1010 | 0   | 640 | 0 | 19 | 2320 | 5.3 | 2.3 |
| 190 | 380 | 813  | 767 | 192 | 0 | 19 | 2320 | 5.3 | 3.2 |
| 190 | 380 | 822  | 426 | 427 | 0 | 19 | 2320 | 5.3 | 2.7 |
| 190 | 380 | 836  | 0   | 683 | 0 | 19 | 2320 | 5.3 | 2.4 |
| 179 | 325 | 799  | 839 | 210 | 0 | 19 | 2320 | 5.3 | 2.9 |
| 179 | 325 | 831  | 490 | 490 | 0 | 19 | 2320 | 5.3 | 2.6 |
| 179 | 325 | 825  | 0   | 923 | 0 | 19 | 2320 | 5.3 | 2.4 |
| 173 | 385 | 698  | 892 | 233 | 0 | 19 | 2320 | 5.3 | 3.5 |
| 173 | 385 | 742  | 515 | 515 | 0 | 19 | 2320 | 5.3 | 2.9 |
| 173 | 385 | 746  | 0   | 963 | 0 | 19 | 2320 | 5.3 | 2.5 |

## References

- [1] J. M. V. Gómez-Soberón, "Porosity of recycled concrete with substitution of recycled concrete aggregate: An experimental study," *Cement and Concrete Research*, vol. 32, no. 8, pp. 1301-1311, 2002/08/01/ 2002, doi: [https://doi.org/10.1016/S0008-8846\(02\)00795-0](https://doi.org/10.1016/S0008-8846(02)00795-0).
- [2] M. Etxeberria, A. R. Mari, and E. Vázquez, "Recycled aggregate concrete as structural material," *Materials and Structures*, journal article vol. 40, no. 5, pp. 529-541, June 01 2007, doi: 10.1617/s11527-006-9161-5.
- [3] L. Evangelista and J. de Brito, "Mechanical behaviour of concrete made with fine recycled concrete aggregates," *Cement and Concrete Composites*, vol. 29, no. 5, pp. 397-401, 2007/05/01/ 2007, doi: <https://doi.org/10.1016/j.cemconcomp.2006.12.004>.
- [4] S. C. Kou, C. S. Poon, and D. Chan, "Influence of Fly Ash as Cement Replacement on the Properties of Recycled Aggregate Concrete," *Journal of Materials in Civil Engineering*, vol. 19, no. 9, pp. 709-717, 2007, doi: doi:10.1061/(ASCE)0899-1561(2007)19:9(709).

- [5] S. C. Kou, C. S. Poon, and D. Chan, "Influence of fly ash as a cement addition on the hardened properties of recycled aggregate concrete," *Materials and Structures*, vol. 41, no. 7, pp. 1191-1201, 2008.
- [6] K.-H. Yang, H.-S. Chung, and A. F. Ashour, "Influence of Type and Replacement Level of Recycled Aggregates on Concrete Properties," 2008.
- [7] R. Kumutha and K. Vijai, "Strength of concrete incorporating aggregates recycled from demolition waste," *ARPJ Journal of Engineering and Applied Sciences*, vol. 5, no. 5, pp. 64-71, 2010.
- [8] C. J. Zega and A. A. D. Maio, "Recycled Concretes Made with Waste Ready-Mix Concrete as Coarse Aggregate," *Journal of Materials in Civil Engineering*, vol. 23, no. 3, pp. 281-286, 2011, doi: doi:10.1061/(ASCE)MT.1943-5533.0000165.
- [9] G. Fathifazl, A. G. Razaqpur, O. B. Isgor, A. Abbas, B. Fournier, and S. Foo, "Creep and drying shrinkage characteristics of concrete produced with coarse recycled concrete aggregate," *Cement and Concrete Composites*, vol. 33, no. 10, pp. 1026-1037, 2011.
- [10] M. C. Rao, S. Bhattacharyya, and S. Barai, "Influence of field recycled coarse aggregate on properties of concrete," *Materials and Structures*, vol. 44, no. 1, pp. 205-220, 2011.
- [11] A. Abd Elhakam, A. E. Mohamed, and E. Awad, "Influence of self-healing, mixing method and adding silica fume on mechanical properties of recycled aggregates concrete," *Construction and Building Materials*, vol. 35, pp. 421-427, 2012/10/01/ 2012, doi: <https://doi.org/10.1016/j.conbuildmat.2012.04.013>.
- [12] P. Pereira, L. Evangelista, and J. De Brito, "The effect of superplasticizers on the mechanical performance of concrete made with fine recycled concrete aggregates," *Cement and concrete composites*, vol. 34, no. 9, pp. 1044-1052, 2012.
- [13] L. Butler, J. S. West, and S. L. Tighe, "Effect of recycled concrete coarse aggregate from multiple sources on the hardened properties of concrete with equivalent compressive strength," *Construction and Building Materials*, vol. 47, pp. 1292-1301, 2013.
- [14] C. Thomas, J. Setién, J. A. Polanco, P. Alaejos, and M. Sánchez de Juan, "Durability of recycled aggregate concrete," *Construction and Building Materials*, vol. 40, pp. 1054-1065, 2013/03/01/ 2013, doi: <https://doi.org/10.1016/j.conbuildmat.2012.11.106>.
- [15] K. H. Younis and K. Pilakoutas, "Strength prediction model and methods for improving recycled aggregate concrete," *Construction and Building Materials*, vol. 49, pp. 688-701, 2013/12/01/ 2013, doi: <https://doi.org/10.1016/j.conbuildmat.2013.09.003>.
- [16] G. Andreu and E. Miren, "Experimental analysis of properties of high performance recycled aggregate concrete," *Construction and Building Materials*, vol. 52, pp. 227-235, 2014/02/15/ 2014, doi: <https://doi.org/10.1016/j.conbuildmat.2013.11.054>.
- [17] Z. H. Duan and C. S. Poon, "Properties of recycled aggregate concrete made with recycled aggregates with different amounts of old adhered mortars," *Materials & Design*, vol. 58, pp. 19-29, 2014.
- [18] P. Folino and H. Xargay, "Recycled aggregate concrete – Mechanical behavior under uniaxial and triaxial compression," *Construction and Building Materials*, vol. 56, pp. 21-31, 2014/04/15/ 2014, doi: <https://doi.org/10.1016/j.conbuildmat.2014.01.073>.
- [19] D. Pedro, J. de Brito, and L. Evangelista, "Performance of concrete made with aggregates recycled from precasting industry waste: influence of the crushing process," *Materials and Structures*, journal article vol. 48, no. 12, pp. 3965-3978, December 01 2015, doi: 10.1617/s11527-014-0456-7.
- [20] C. Thomas, I. Sosa, J. Setién, J. A. Polanco, and A. I. Cimentada, "Evaluation of the fatigue behavior of recycled aggregate concrete," *Journal of Cleaner Production*, vol. 65, pp. 397-405, 2014/02/15/ 2014, doi: <https://doi.org/10.1016/j.jclepro.2013.09.036>.

## 6. Randomization tests

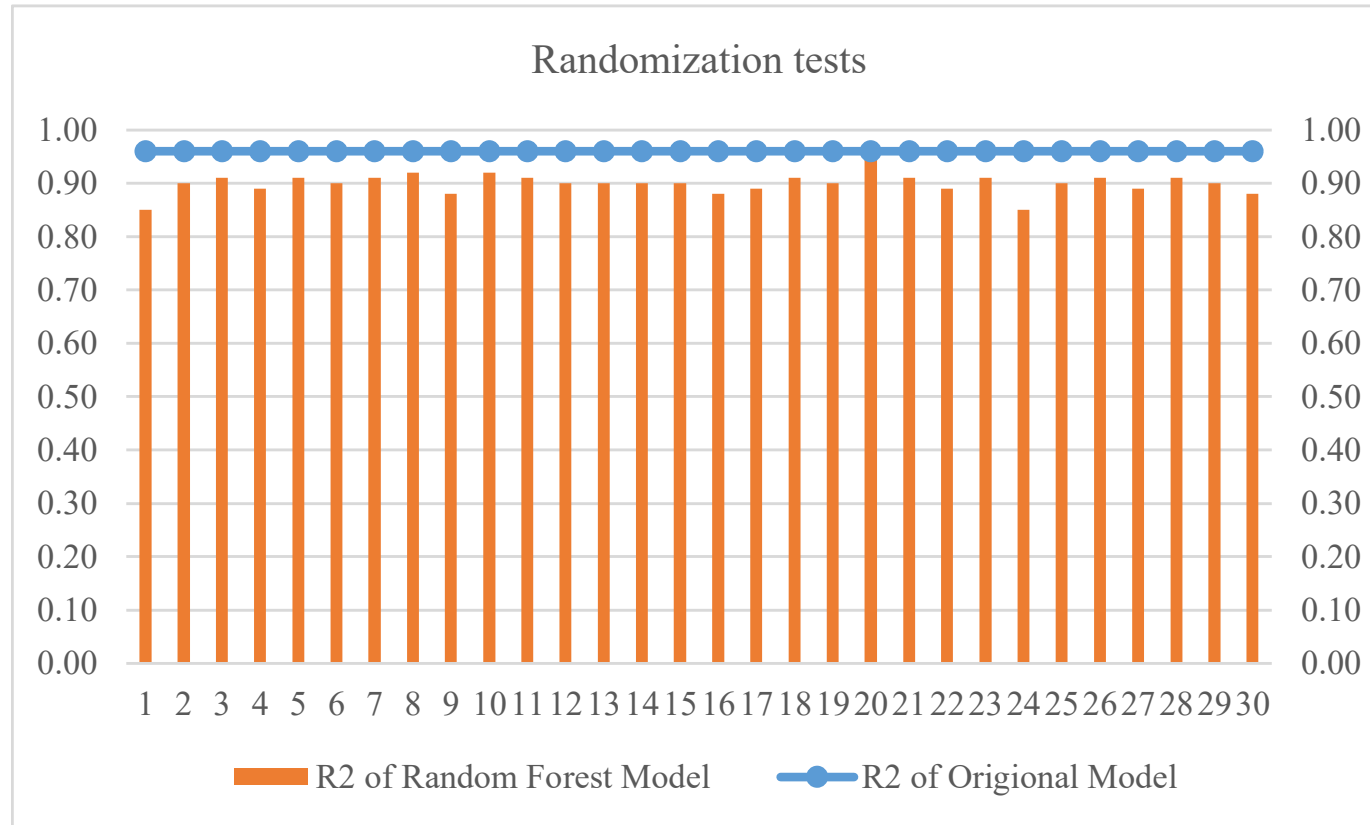

Figure S1. RF randomization test.
